# Supplementary material for: Use of nanosphere self-assembly to pattern nanoporous membranes for the study of extracellular vesicles
Source: Royal Society of Chemistry journal article supplement (doi:10.1039/d0na00142b), 2020-01-01
Supplement: d0na00142b2.pdf [file d0na00142b2.pdf]

## Use of Nanosphere Self-Assembly to Pattern Ultrathin Membranes for the Study of Extracellular Vesicles

Authors: Marcela Mireles,<sup>1,2</sup> Cody Soule,<sup>1</sup> Mehdi Dehghani,<sup>1</sup> and Thomas R. Gaborski<sup>1,2</sup>

1. Department of Biomedical Engineering, Rochester Institute of Technology, Rochester, NY, USA

2. Department of Biomedical Engineering, University of Rochester, Rochester, NY, USA

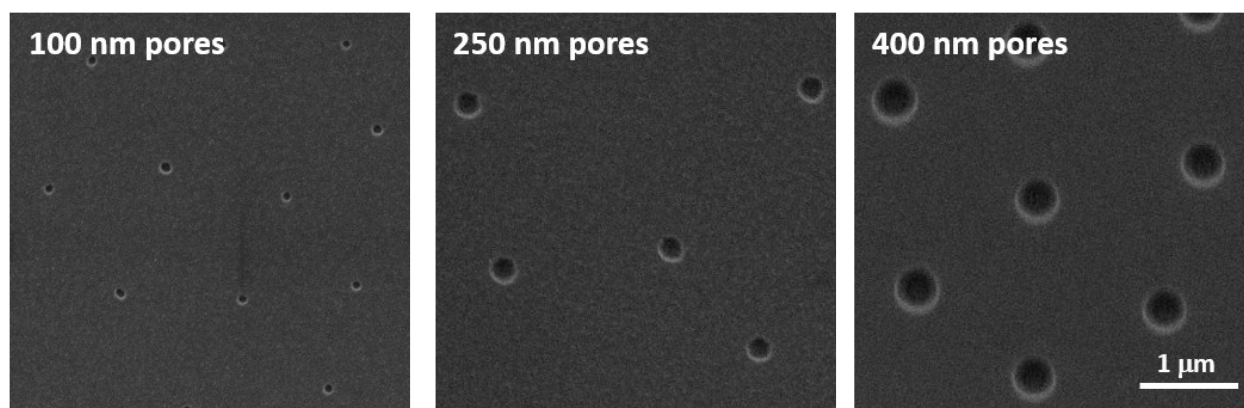

**Figure S1. SiO<sub>2</sub> membranes.** Top-view electron micrographs taken from three different SiO<sub>2</sub> membranes fabricated following the same procedure described for SiN in the main manuscript.

In this case, the SiO<sub>2</sub> was deposited by plasma enhanced chemical vapor deposition in an Applied Materials P500 tool at 390 °C and a working pressure of 1.2 kPa using tetraethoxysilane (TEOS) as precursor. After SiO<sub>2</sub> deposition, the stack (Si/ZnO/SiO<sub>2</sub>) was annealed at 600 °C under N<sub>2</sub> flow for 1 h for stress stabilization. This SiO<sub>2</sub> deposition and subsequent annealing has been previously found to yield a tensile film stress of 150 MPa, stable over time.<sup>1</sup>

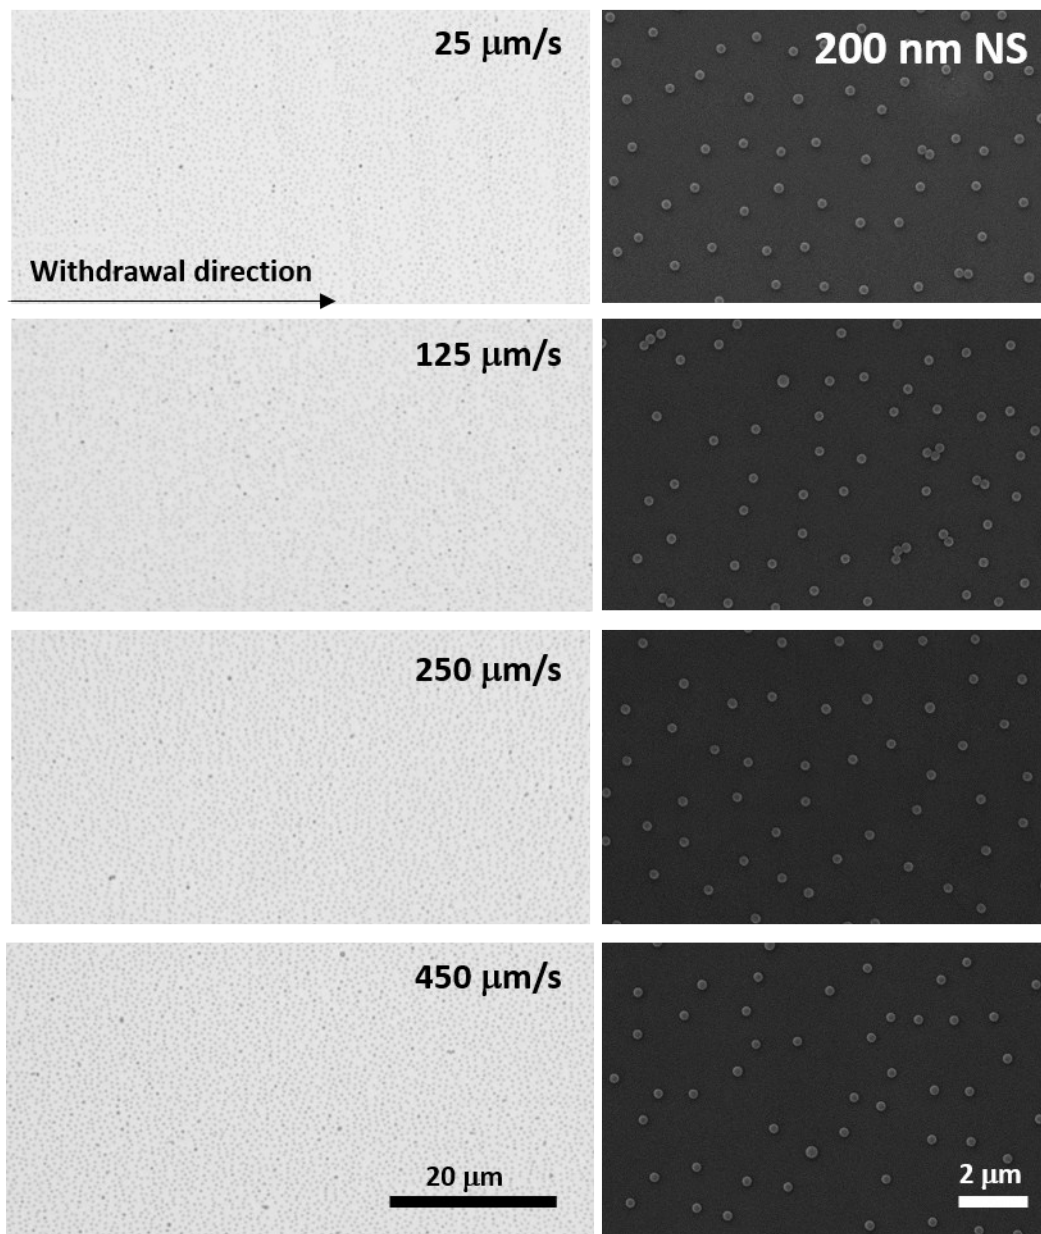

**Figure S2. Withdrawal speed optimization.** Optical and electron micrographs taken from 200 nm self-assembled monolayers transferred onto a substrate at different withdrawal speeds.

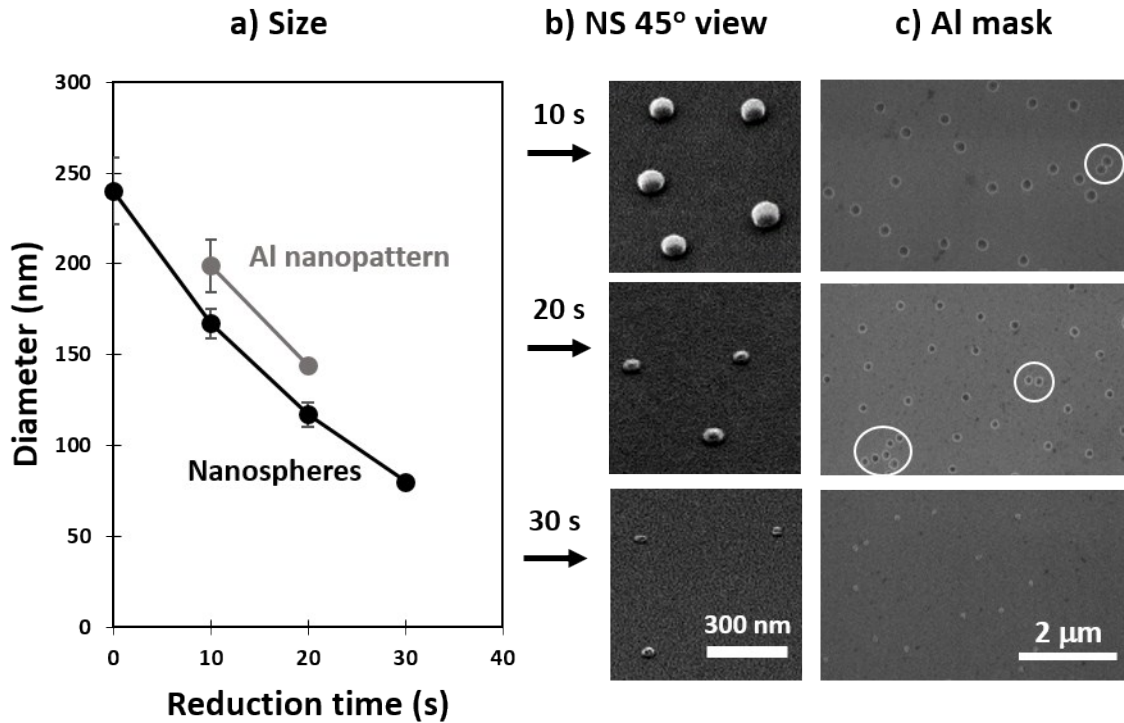

**Figure S3. Nanosphere size reduction.** a) diameter of the reduced nanospheres (200 nm nominal size) and the resulting nanopores in the Al mask, b) tilted-view of the reduced nanospheres, and c) the resulting pores in the Al mask and unmerging of pores.

The Al mask produced after 10 s of nanosphere reduction presents a doublet (circled in white). When reducing the nanospheres for 20 s two individual pores are observed in close proximity, these constitute a doublet that has been unmerged after reducing the size of the nanospheres.

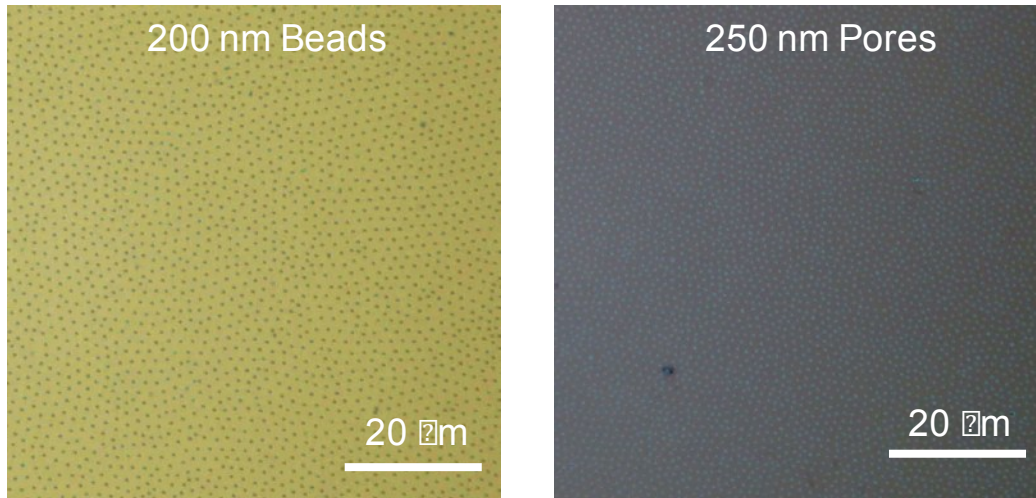

**Figure S4. Optical images of beads and corresponding NSL membrane.** 100x magnification optical microscopy images of 200 nm beads on a substrate and the resulting 250 nm pores following etching mask fabrication and nanoporous pattern transfer into the SiN membrane.

**Supporting video 1. Membrane lift-off:** following immersion in 1M HCl for sacrificial film removal, an ultrathin nanoporous silico nitride membrane is released from its supporting substrate, Si wafer, with the use of tweezers.

- (1) Carter, R. N.; Casillo, S. M.; Mazzocchi, A. R.; DesOrmeaux, J.-P. S.; Roussie, J. A.; Gaborski, T. R. Ultrathin Transparent Membranes for Cellular Barrier and Co-Culture Models. *Biofabrication* **2017**, *9*, 15019.
